# Supplementary material for: Monitoring of dynamic ATP level changes by oligomycin-modulated ATP synthase inhibition in SW480 cancer cells using fluorescent “On-Off” switching DNA aptamer
Source: PubMed Central journal article supplement (PMC6834760; doi:10.1007/s00216-019-02061-0), 2019-08-12
Supplement: 216_2019_2061_MOESM1_ESM.pdf [file 216_2019_2061_MOESM1_ESM.pdf]

## **Analytical and Bioanalytical Chemistry**

### **Electronic Supplementary Material**

#### **Monitoring of dynamic ATP level changes by oligomycin-modulated ATP synthase inhibition in SW480 cancer cells using fluorescent “On-Off” switching DNA aptamer**

Katarzyna Ratajczak, Agnieszka Lukasiak, Hubert Grel, Beata Dworakowska,  
Slawomir Jakiela, Magdalena Stobiecka

### ***Detection of ATP using fluorescent ATP aptamer (Apt(ATP))***

A response of an Apt(ATP) probe to the higher concentrations of ATP, in the mM range, is presented in Figure S1. The measurements under these conditions are characterized with a lower probe sensitivity, necessary to cover the larger dynamic range, including the elevated ATP levels in some cells under extreme conditions.

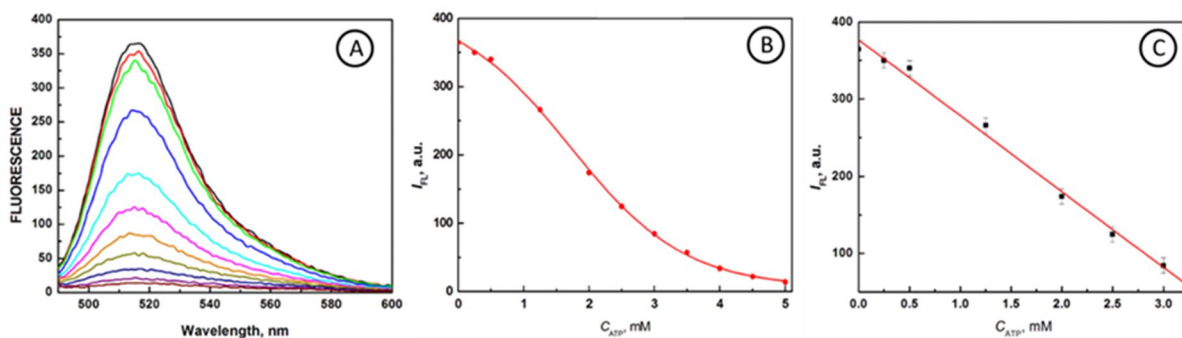

**Fig. S1** (A) Fluorescence spectra for ATP aptamer after addition of ATP at different concentrations from 0 to 5 mM; (B) Dependence of  $I_{FL}$  vs.  $C_{ATP}$  in a wide range from 0 to 5 mM ATP; (C) Linear part of the dependence of  $I_{FL}$  vs.  $C_{ATP}$
